# Supplementary material for: Caudate Nucleus and Insular Activation During a Pain Suppression Paradigm Comparing Thermal and Electrical Stimulation
Source: PubMed Central journal article supplement — Open Neuroimag J. 2011 Jan 18;5:1–8. doi: 10.2174/1874440001105010001 (PMC3106353; doi:10.2174/1874440001105010001), 2011-01-18
Supplement: TONIJ-5-1_SD1.pdf [file TONIJ-5-1_SD1.pdf]

**Table 2. (Supplementary Material):**

**Activation During Suppression of Pain Under Tonic Stimulation with Different Modalities. Voxel Threshold  $p < 0.001$  Uncorrected, Clusterthreshold  $> 10$  Voxels**

**All (up to 7) local Maxima of Clusters. (Submaxima Only in Brackets Without Coordinates).**

**a) Areas Activating During Electrostimulation (Data Originally Presented in [18])**

| Stimulus Side, Contrast | Brain Region Activated                          | Anatomical Description of the Local Maximum | Brod-Mann Area | Coordi-Nates | z-Value |
|-------------------------|-------------------------------------------------|---------------------------------------------|----------------|--------------|---------|
| Right<br>Tpe-r          | Ipsilateral pulvinar thalami                    | Rt thalamus                                 |                | 20,-34,12    | 6.19    |
|                         | Ipsilateral temporal cortex                     | Rt PHG                                      | 30             | 32,-52,2     | 5.61    |
|                         | Ipsilateral caudate body                        | Rt caudate                                  |                | 12,10,16     | 5.46    |
|                         | (Ipsilateral) premotor area, extending to ACC   | Rt SFG                                      | 6              | 2,16,72      | 5.17    |
|                         | Ipsilateral anterior insula, extending to DLPFC | Rt insula                                   | 47             | 32,18,-2     | 5.15    |
|                         | Contralateral insula                            | Lt insula                                   | 13             | -44,-4,8     | 4.69    |
|                         | Right DLPFC                                     | Rt SFG                                      | 10             | 40,52,20     | 4.61    |
| Left<br>Tpe-r           | Contralateral thalamus                          | Rt thalamus                                 |                | 14,-22,18    | 5.13    |
|                         | Contralateral caudate head, extending to body   | Rt caudate                                  |                | 8,20,0       | 5.0     |
|                         | Contralateral operculum, adjacent to insula     | Rt PCG                                      | 43             | 64,-18,20    | 4.98    |
|                         | Ipsilateral temporal cortex                     | Lt PHG                                      | 30             | -24,-48,6    | 4.84    |
| Right<br>Tpl-r          | Contralateral frontal cortex                    | Lt MFG                                      | 8              | -22,18,34    | 4.69    |
| Left<br>Tpl-r           | Contralateral operculum, adjacent to insula     | Rt PCG                                      | 40             | 62,-18,18    | 4.96    |
|                         | Contralateral SI                                | Rt PCG                                      | 3              | 54,-18,54    | 4.69    |
|                         | Near ACC                                        | RT MFG                                      | 6              | 18,26,36     | 4.30    |

**b). Areas Activating During Thermostimulation (Data Originally Presented in [7]):**

| Stimulus Side, Contrast | Brain Region Activated                                                                                                                              | Anatomical Description of the Local Maximum | Brod-Mann Area | Coordi-Nates | z-Value |
|-------------------------|-----------------------------------------------------------------------------------------------------------------------------------------------------|---------------------------------------------|----------------|--------------|---------|
| Right<br>Tpe-r          | Contralateral DLPFC (extending bilaterally to caudate head)                                                                                         | Lt IFG                                      | 47             | -16,22,-14   | 5.26    |
|                         | Contralateral DLPFC                                                                                                                                 | Lt IFG                                      | 47             | -30,30,2     | 5.18    |
|                         | Contralateral AII (extending to PCG BA 2 = SI)                                                                                                      | Lt STG                                      | 42             | -60,-24,8    | 4.75    |
|                         | Contralateral attentional networks                                                                                                                  | Lt IPL                                      | 40             | -46,-34,34   | 4.73    |
|                         | Ipsilateral supplementary motor areas                                                                                                               | Rt MFG                                      | 6              | 20,6,48      | 4.65    |
|                         | Also activated with weaker clusters: BA6 ( $z=4.64$ ) extending to ACC BA32; also right anterior insula / operculum and bilateral posterior insula. |                                             |                |              |         |

**Supplementary Table 2b. Contd....**

| Stimulus Side, Contrast | Brain Region Activated                                                                                          | Anatomical Description of the Local Maximum | Brod-Mann Area | Coordi-Nates | z-Value |
|-------------------------|-----------------------------------------------------------------------------------------------------------------|---------------------------------------------|----------------|--------------|---------|
| Left<br>Tpe-r           | SII (including BA1, BA6)                                                                                        | Lt PCG                                      | 5              | -20,-42,70   | 5.28    |
|                         | Adjacent to ACC, BA 32 (3mm), (incl SFG BA6)                                                                    | Rt MFG                                      | 8              | 2,24,44      | 5.24    |
|                         | Emotional proc (Royet et al) (incl BA 10, 46=DLPFC)                                                             | Lt MFG                                      | 9              | -32,42,28    | 5.24    |
|                         | Right anterior insula / operculum                                                                               | Rt insula                                   | 13             | 40,16,2      | 5.22    |
|                         | DLPFC.                                                                                                          | Rt MFG                                      | 46             | 52,20,22     | 5.2     |
|                         | Also activated with weaker clusters: Bilateral caudate head (z=4.66) and bilateral posterior insula / operculum |                                             |                |              |         |
| Right<br>Tpl-r          | DLPFC (incl. IFG)                                                                                               | Rt sublobar                                 | 47             | 38,20,-2     | 3.67    |
|                         | Ipsilateral frontal cortex                                                                                      | Rt MFG                                      | 6              | 12,2,62      | 3.63    |
|                         | Ipsilateral cerebellar posterior lobe, semilunar lobule                                                         | Rt Cerebellum                               |                | 44,-62,-38   | 3.61    |
|                         | Ipsilateral frontal lobe                                                                                        | Rt preCG                                    | 6              | 32,-10,34    | 3.60    |
|                         | Contralateral optical association areas                                                                         | Lt MOG                                      | 18             | -12,-94,16   | 3.60    |
| Left<br>Tpl-r           | Ipsilateral Claustrum                                                                                           | Lt Claustrum                                |                | -28,14,12    | 4.92    |
|                         | Ipsilateral DLPFC (extending to BA9)                                                                            | Lt MFG                                      | 10             | -26,42,12    | 4.85    |
|                         | Contralateral temporal cortex                                                                                   | Rt STG                                      | 38             | 34,20,-22    | 4.75    |
|                         | Contralateral ACC                                                                                               | Rt ACC                                      | 24             | 14,6,44      | 4.51    |
|                         | Contralateral frontal cortex                                                                                    | Rt MFG                                      | 6              | 10,4,64      | 4.37    |

Rt right, Lt left, PCG postcentral gyrus, MTG middle temporal gyrus, preCG precentral Gyrus, IFG inferior frontal gyrus, SFG superior frontal gyrus, PHG parahippocampal gyrus, MFG middle frontal gyrus, IFG inferior frontal gyrus, STG superior temporal gyrus, IPL inferior parietal lobule, MOG middle occipital gyrus, ACC anterior cingulate cortex.
